# Supplementary material
Source: HighWire-hosted journal article supplement (http://www.annfammed.org/highwire/filestream/8797/field_highwire_adjunct_files/0/Blane_Supp_App.pdf)
Supplement: Blane_Supp_App.pdf [file Blane_Supp_App.pdf]

## Supplemental materials for:

Blane DN, Sambale P, Williamson AE, et al. A change model for GPs serving deprived areas. *Ann Fam Med*. 2017;15(3):xxx-xxx.

David N. Blane, MBChB, MPH<sup>1</sup>

Petra Sambale, FRCGP<sup>2</sup>

Andrea E. Williamson, PhD<sup>3,4</sup>

Graham C.M. Watt, MD<sup>4</sup>

<sup>1</sup>Maryhill Health and Care Centre and University of Glasgow, Glasgow, Scotland

<sup>2</sup>Keppoch Medical Practice, Possilpark, Glasgow, Scotland

<sup>3</sup>Homeless Health and Resource Centre, Glasgow, Scotland

<sup>4</sup>University of Glasgow, Glasgow, Scotland

**Funding support:** The project described herein was funded by the Scottish Government GP Recruitment and Retention Fund. No financial support was provided for the writing of this manuscript.

**Acknowledgments:** We would like to acknowledge the participating practices and all other practices involved in the 'GPs at the Deep End' project.

## References

1. MacVicar R, Williamson AE, Cunningham D, Watt G. What are the CPD needs of GPs working in areas of high deprivation? Report of a focus group meeting of 'GPs at the deep end'. *Educ Prim Care*. 2015;26(3):139-145.
2. Mercer SW, Fitzpatrick B, Guthrie B, et al. The CARE Plus study - a whole-system intervention to improve quality of life of primary care patients with multimorbidity in areas of high socioeconomic deprivation: exploratory cluster randomised controlled trial and cost-utility analysis. *BMC Med*. 2016;14(1):88. 10.1186/s12916-016-0634-2.
3. National Links Worker Programme. <http://links.alliance-scotland.org.uk/>

## Supplemental Appendix

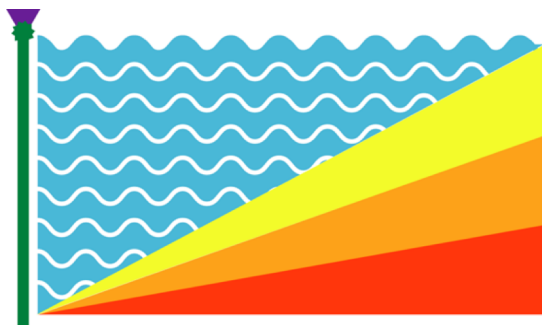

### **Background to GPs at the Deep End ([www.gla.ac.uk/deepend](http://www.gla.ac.uk/deepend))**

General Practitioners at the Deep End work in 100 general practices serving the most socio-economically deprived populations in Scotland, based on the proportion of patients on the practice list with postcodes in the most deprived 15% of Scottish datazones.

'GPs at the Deep End' activities can be grouped into four areas:

- 1) Advocacy – mostly around the inverse care law
- 2) Research/Evidence – both formal University research and evidence based on frontline experience
- 3) Service development – specific projects such as the Community Links worker and Govan SHIP projects
- 4) Professional development – supporting training and CPD needs of GPs in deprived areas

Inspired by the example set by the Scottish Deep End GP group, there are now similar groups being set up in Ireland (<http://deepend.ie/>), England (<https://yorkshiredependgp.org/>), and Australia.
